# Supplementary material
Source: MDPI journal article supplement (https://www.mdpi.com/2072-4292/12/6/987)
Supplement: s1 [file s1]

# Supplementary Material

**Table S1.** The land cover classification system for the China-Pakistan Economic Corridor.

| Level 1 |                    | Level 2                     |                                                                           |
|---------|--------------------|-----------------------------|---------------------------------------------------------------------------|
| Code    | Name               | Name                        | Description                                                               |
| 1       | Forest land        | Evergreen broadleaf forest  | H = 3–30 m, C ≥ 20%, evergreen, broadleaf                                 |
|         |                    | Deciduous broadleaf forest  | H = 3–30 m, C ≥ 20%, deciduous, broadleaf                                 |
|         |                    | Evergreen needleleaf forest | H = 3–30 m, C ≥ 20%, evergreen, needleleaf                                |
|         |                    | Deciduous needleleaf forest | H = 3–30 m, C ≥ 20%, deciduous, needleleaf                                |
| 2       | Shrubland          | Mixed forest                | H = 3–30 m, C ≥ 20%, 25% < F < 75%                                        |
|         |                    | Evergreen shrubland         | H = 0.3–5 m, C ≥ 20%, evergreen                                           |
|         |                    | Deciduous shrubland         | H = 0.3–5 m, C ≥ 20%, deciduous                                           |
| 3       | Grassland          | Grassland                   | H = 0.03–3m, C ≥ 20%                                                      |
| 4       | Wetland            | Tree wetland                | W > 2 or wet soil, H = 3–30 m, C ≥ 20%                                    |
|         |                    | Shrub wetland               | W > 2 or wet soil, H = 0.3–5 m, C ≥ 20%                                   |
|         |                    | Herbaceous wetland          | W > 2 or wet soil, H = 0.03–3 m, C ≥ 20%                                  |
| 5       | Open water         | Flood plain                 | Seasonal flood, C < 4%                                                    |
|         |                    | Open water                  | Water surface                                                             |
| 6       | Cropland           | Paddy field                 | Artificial vegetation, soil disturbance, aquatic crop, harvest process    |
|         |                    | Dry farmland                | Artificial vegetation, soil disturbance, xerophytic crop, harvest process |
| 7       | Impervious surface | Orchard                     | Artificial vegetation, H = 0.3–30 m, C ≥ 20%                              |
|         |                    | Impervious surface          | Built-up hard surface                                                     |
|         |                    | Sparse vegetation           | H = 3–30 m, C = 4–20%                                                     |
| 8       | Bare land          | Bare rock                   | Natural, hard surface, stone, C < 4%                                      |
|         |                    | Bare soil                   | Natural, soft surface, soil, C < 4%                                       |
|         |                    | Salina                      | Natural, soft surface, high salinity                                      |
|         |                    | Desert                      | Natural, soft surface, sand, C < 4%                                       |
| 9       | Permanent ice/snow | Permanent ice/snow          | Natural, solid water                                                      |

Notes: C = vegetation cover/canopy closure; F = needleleaved tree/broadleaved tree; H = plant height (m); W = annual time covered by water (months).
